# Supplementary material
Source: PubMed Central journal article supplement (PMC2957793)
Supplement: e6161a910d8dfbac7044754086cfab4c_figS1-S2.pdf [file e6161a910d8dfbac7044754086cfab4c_figS1-S2.pdf]

# Supplemental Figure 1

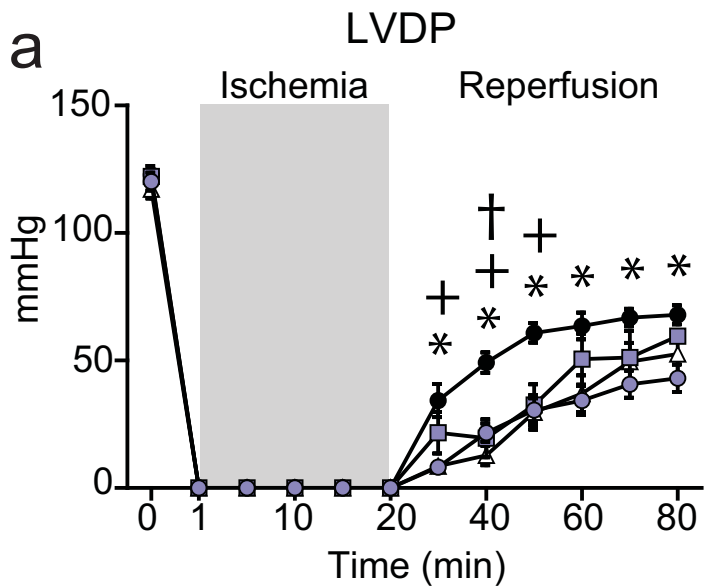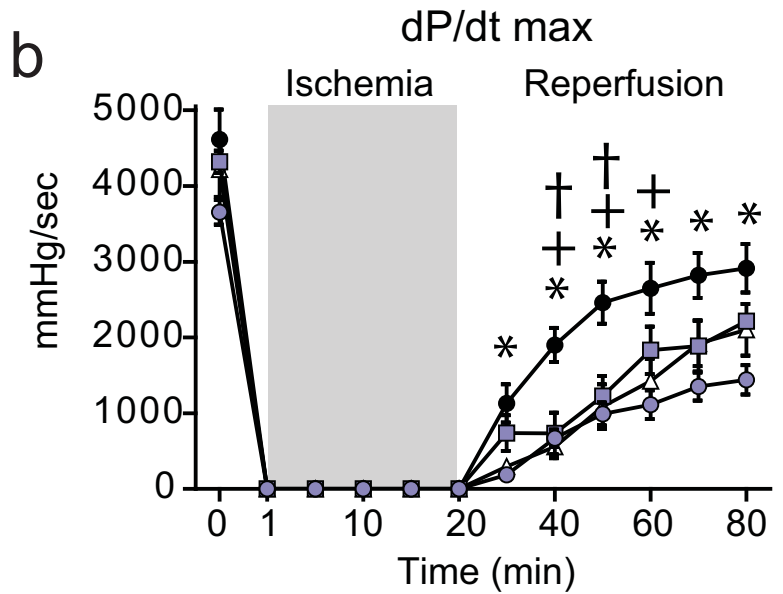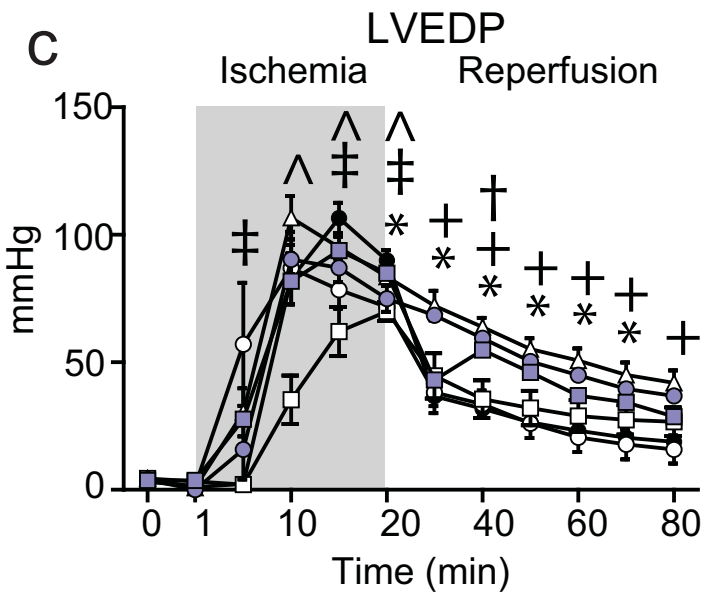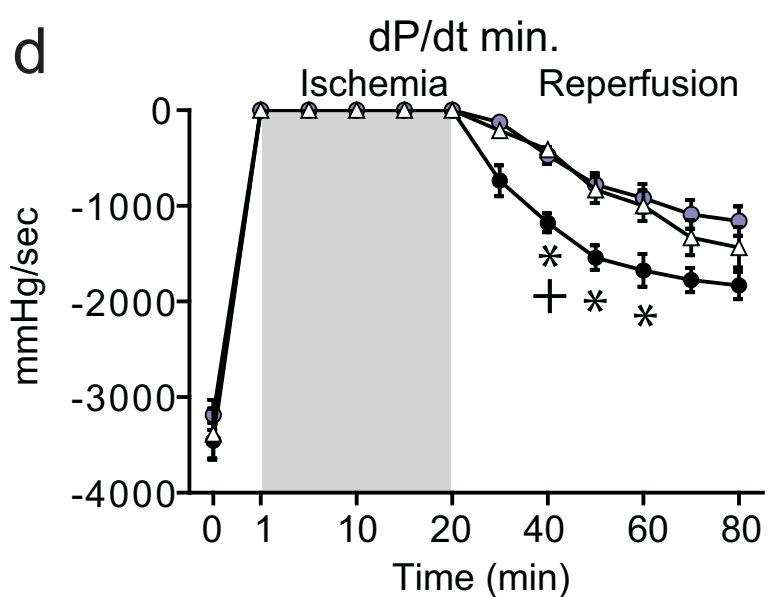

- C57BL/6J
- FVB/NJ
- DBA/2J
- △ 129X1/SvJ
- C57BL/10SnJ
- 129S1/SvImJ

# Supplemental Figure 2

- Cohort 1
- Cohort 2

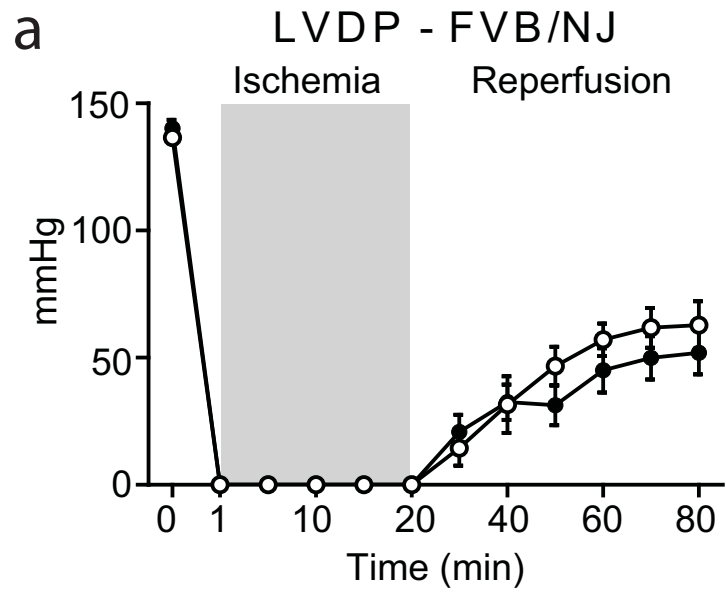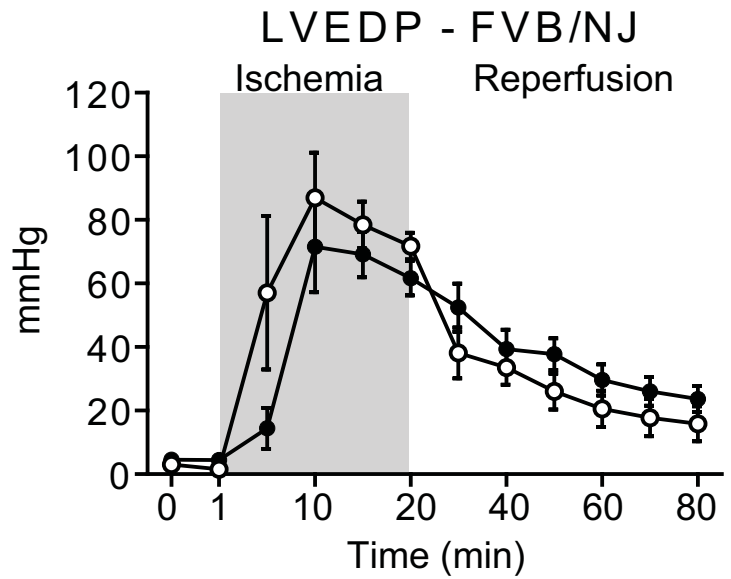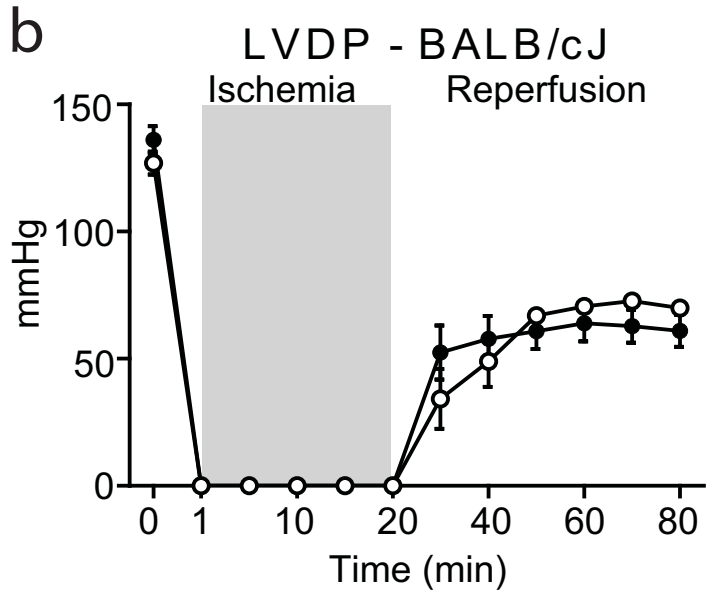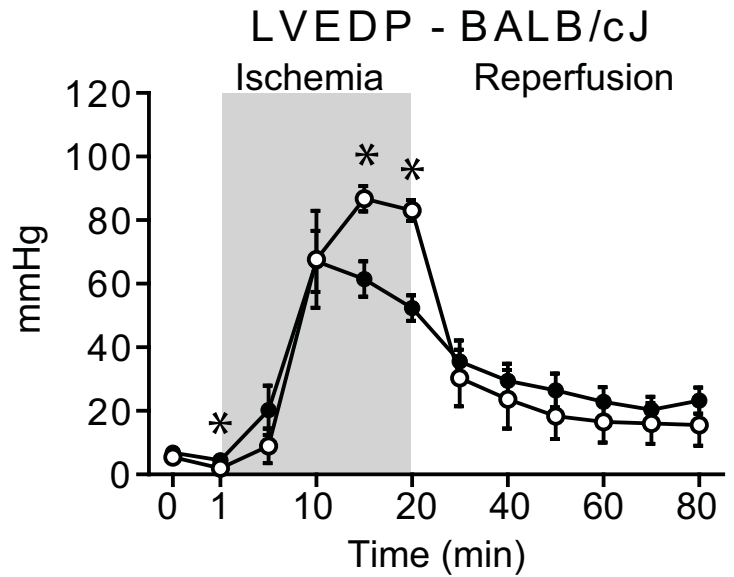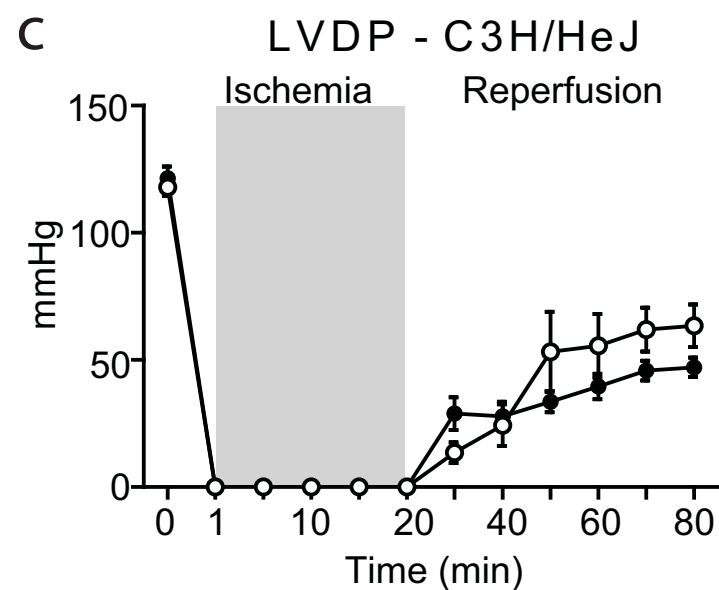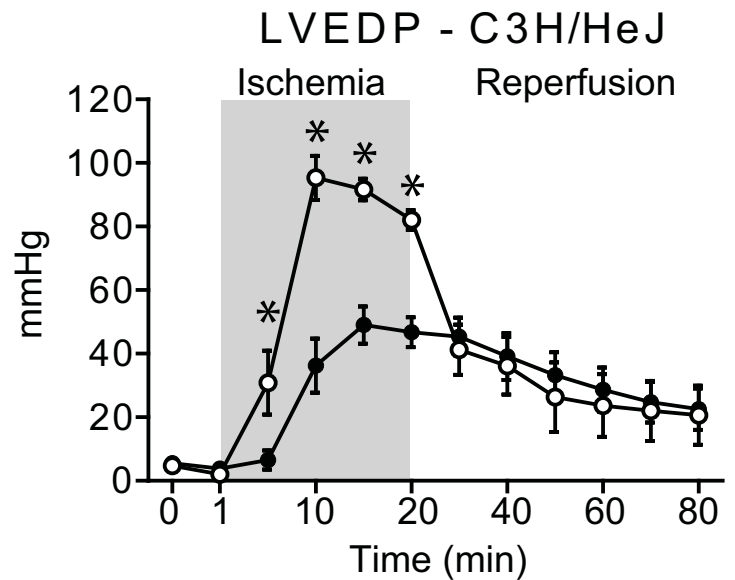

**Supplemental figure 1** - Cardiac performance of isolated hearts measured during global ischemia and reperfusion. For clarity, inbred strains which showed no significant differences from C57BL/6J during ischemia and reperfusion are not included in these Figures but were included in statistical analysis. a, b - Systolic function quantified by left ventricular developed pressure (LVDP) and the maximum derivative of left ventricular pressure (max. dP/dt), respectively. c, d - Diastolic function quantified by the minimum derivative of left ventricular pressure (min. dP/dt) and tau, respectively. Differences from C57BL/6J detected by one-way ANOVA. Values are expressed as mean  $\pm$  SEM. n = 5-8 for each group. a-d - significant differences from C57BL/6J indicated by the following symbols. ‡, ^, +, †, \* - FVB/NJ, DBA/2J, 129X1/SvJ, C57BL/10SnJ, 129SvImJ, respectively.

**Supplemental figure 2** – The stability of *ex vivo* function measurements demonstrated by comparison of *ex vivo* functional data generated from two distinct cohorts of FVB/NJ, C3H/HeJ and BALB/cJ isolated hearts carried out several months apart. Cohort 1 was a pilot study carried out prior to the larger scale Cohort 2, from which all other data presented was generated. Isolated hearts were subjected to global ischemia and reperfusion. n = 5-7. \* P < 0.05 compared to Cohort 1 by t-test.
